# Supplementary material for: Synthesis, structures, and magnetic properties of four copper compounds with 2,2′-dinitrobiphenyl-4,4′-dicarboxylate
Source: Royal Society of Chemistry journal article supplement (doi:10.1039/c2dt31378b), 2012-01-01
Supplement: c2dt31378b.pdf [file c2dt31378b.pdf]

## Electronic Supplementary Information (ESI)

### Synthesis, Structures, and Magnetic Properties of Four Copper Compounds with 2,2'-Dinitrophenyl-4,4'-dicarboxylate

#### Ligands

*Jian-Yong Zhang, Xiu-Bing Li, Kun Wang, Yu Ma, Ai-Ling Cheng, and En-Qing Gao\**

*Shanghai Key Laboratory of Green Chemistry and Chemical Processes, Department of Chemistry,  
East China Normal University, Shanghai 200062, China.*

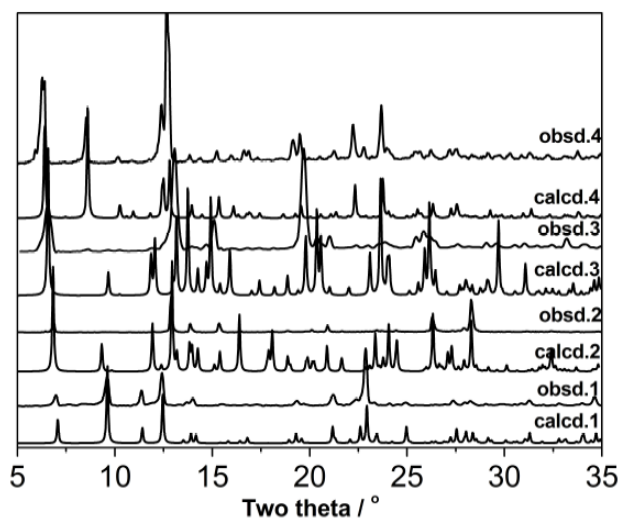

Fig. S1. PXRD patterns based on the X-ray single crystal diffractions and the observed sample for compound 1 – 4.

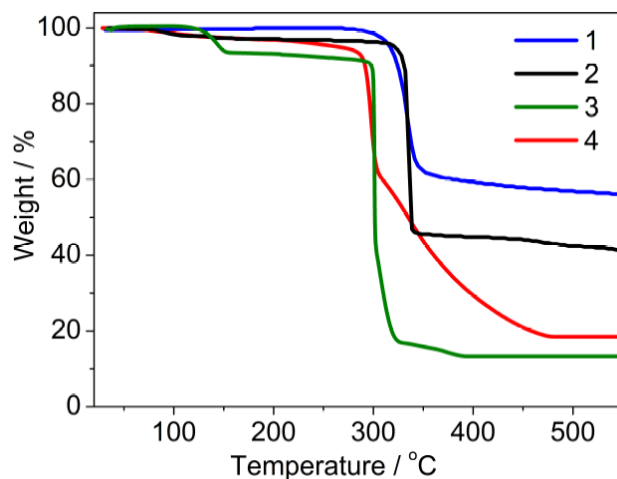

Fig. S2. The TGA plot of compound 1 - 4.

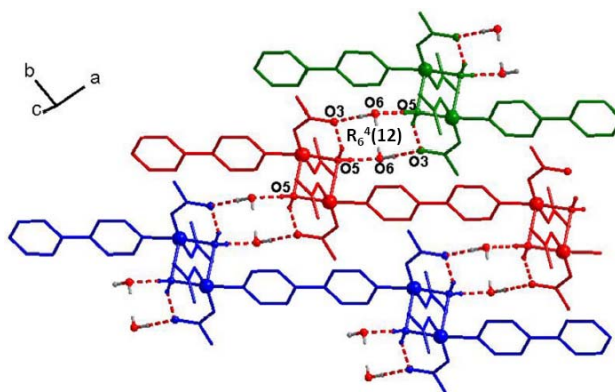

Fig. S3. View of the hydrogen bonding interactions between the guest H<sub>2</sub>O molecules (O6) and bridging H<sub>2</sub>O (O5), uncoordinated carboxylate oxygen atoms (O3).

Table S1. Selected bond lengths (Å) and angles (°) for compound 3.

|                 |          |            |          |
|-----------------|----------|------------|----------|
| Cu1-O1          | 1.910(3) | Cu1-O4A    | 1.956(3) |
| Cu1-O5          | 1.971(3) | Cu1-N1     | 1.992(3) |
| Cu1-O5B         | 2.438(3) |            |          |
| O1-Cu1-O4A      | 168.1(1) | O4A-Cu1-O5 | 90.3(1)  |
| O1-Cu1-O5       | 86.1(1)  | O4A-Cu1-N1 | 90.3(1)  |
| O1-Cu1-N1       | 94.9(1)  | O1-Cu1-O5B | 88.2(1)  |
| O5-Cu1-N1       | 172.0(1) | O5-Cu1-O5B | 82.7(1)  |
| O4A-Cu1-O5B     | 102.5(1) | N1-Cu1-O5B | 89.4(1)  |
| Cu1-O5-Cu1B     | 97.3(1)  |            |          |
| Hydrogen bonds: |          |            |          |
| O5...O3A        | 2.560(3) | O5-H...O3A | 146(3)   |
| O5...O6C        | 2.622(5) | O5-H...O6C | 165(2)   |
| O6...O3D        | 2.755(5) | O6-H...O3D | 166(3)   |

Symmetry code: A x+1, y+1, z+1; B -x, -y, -z; C x, y, z; D -x, -y-1, -z-1.
